# Supplementary material for: Concerted actions of DnaA complexes with DNA-unwinding sequences within and flanking replication origin oriC promote DnaB helicase loading
Source: PubMed Central journal article supplement — J Biol Chem. 2022 May 19;298(6):102051. doi: 10.1016/j.jbc.2022.102051 (PMC9198467; doi:10.1016/j.jbc.2022.102051), 2022-05-19
Supplement: mmc1.pdf [file mmc1.pdf]

## **Supporting information**

### **Concerted actions of DnaA complexes with DNA unwinding sequences within and flanking replication origin *oriC* promote DnaB helicase loading**

Yukari Sakiyama, Mariko Nagata, Ryusei Yoshida, Kazutoshi Kasho, Shogo Ozaki, and Tsutomu Katayama

#### **Contents**

Supporting Tables S1-S4

Supporting Figures S1-S7

References

**Supporting Table S1. Oligonucleotides designed for this study**

| Name          | 5'-Sequence                                  |
|---------------|----------------------------------------------|
| delAT         | TCTAAATAAATAGATCTAGAGGATCCCAGGTCTTTCTCAAGCCG |
| delATL        | TAGAGGATCCCAGGTCTTTCTCAAGCCG                 |
| U-ATL         | TATTA AAAAGAAGATCTATTTATTTA                  |
| L-ATL         | TAAATAAATAGATCTTCTTTTAAATA                   |
| U-LM          | GATCTATTTATTTAGAGATCTGTTCTATT                |
| L-LM          | AATAGAACAGATCTCTAAATAAATAGATC                |
| M28           | GATCTGTTCTATTGTGATCTCTTATTAG                 |
| M28rev        | CTAATAAGAGATCACAATAGAACAGATC                 |
| DOR96R2R4-f   | GAGGGGTTATACACA ACTCAAAAAC                   |
| rightDOR102F  | CTCAAAA ACTGAACAACAGTTG                      |
| KWSmaloriCFwd | CCCGGGCCGTGGATTCTAC                          |
| yy15          | AGCCAGGAACCGGCCGTAACCATCTGGCGGC              |
| yy16          | GCCGCCAGATGGTTACGGCCGGTTCCTGGCT              |
| yyc9          | CAGACCGAAGCGAAATACGAAAAAGTG                  |
| yyc10         | CACTTTTTCGTATTTTCGCTTCGGTCTG                 |

**Supporting Table S2. Plasmids used in this study**

| Name                              | Relevant structure                                                                                      | Reference or source           |
|-----------------------------------|---------------------------------------------------------------------------------------------------------|-------------------------------|
| M13 <i>oriCMS9</i>                | M13mp18 bearing 431 bp chromosome-derived <i>oriC</i>                                                   | Shimizu <i>et al.</i> , 2016  |
| pRS <i>oriC</i>                   | pBR322 bearing chromosomal region ( <i>gidA'</i> - <i>oriC-mioC-asnC</i> ) and <i>asnA::frt-kan-frt</i> | Noguchi <i>et al.</i> , 2015  |
| pRSR5M <i>Tma</i>                 | pRS <i>oriC</i> R5M box:: <i>TmaDnaA</i> box                                                            | Sakiyama <i>et al.</i> , 2017 |
| pRSR4 <i>Tma</i>                  | pRS <i>oriC</i> R4 box:: <i>TmaDnaA</i> box                                                             | Noguchi <i>et al.</i> , 2015  |
| pECTM                             | pING-1 bearing arabinose-inducible promoter and <i>ChidnaA</i>                                          | Noguchi <i>et al.</i> , 2015  |
| pECTM-V211A                       | pECTM <i>ChidnaA</i> V211A                                                                              | Sakiyama <i>et al.</i> , 2017 |
| pECTM-R245A                       | pECTM <i>ChidnaA</i> R245A                                                                              | Sakiyama <i>et al.</i> , 2017 |
| pECTM-V211A/R245A                 | pECTM <i>ChidnaA</i> V211A R245A                                                                        | Sakiyama <i>et al.</i> , 2017 |
| pBS <i>oriC</i>                   | pBluescript II bearing <i>oriC</i>                                                                      | Ozaki and Katayama, 2012      |
| pBS-left <i>oriC</i>              | pBS <i>oriC</i> $\Delta$ (R4-R2)                                                                        | Ozaki and Katayama, 2012      |
| pBS-left <i>oriC</i> $\Delta$ AT  | pBS <i>oriC</i> $\Delta$ (R4-R2) $\Delta$ AT                                                            | This work                     |
| pBS-left <i>oriC</i> $\Delta$ ATL | pBS <i>oriC</i> $\Delta$ (R4-R2) $\Delta$ (AT-L)                                                        | This work                     |
| pBS <i>oriC</i> R4 <i>Tma</i>     | pBS <i>oriC</i> R4 <i>Tma</i>                                                                           | This work                     |
| M13 <i>oriCMS9</i> R4 <i>Tma</i>  | M13 <i>oriCMS9</i> R4 box:: <i>TmaDnaA</i> box                                                          | This work                     |
| pBAD/His-dnaC                     | pBAD/His-B bearing <i>dnaC</i>                                                                          | This work                     |
| pBAD/His-dnaC K112R               | pBAD/His-B bearing <i>dnaC</i> K112R                                                                    | This work                     |
| pBAD/His-dnaC S177A               | pBAD/His-B bearing <i>dnaC</i> K177A                                                                    | This work                     |

**Supporting Table S3. Preparation of DOR used in this report**

| Name                   | Amplified region | Length (bp) | Primers               | Template     |
|------------------------|------------------|-------------|-----------------------|--------------|
| Left-DOR               | R1-I2            | 118         | ori1<br>Dr2           | pBSoriC      |
| Middle/Right-DOR       | R2-R4            | 118         | DOR96R2R4-f<br>ori-2  | pBSoriC      |
| Middle/Right-DOR-R4Tma | R2-R4 (R4Tma)    | 118         | DOR96R2R4-f<br>ori-2  | pBSoriCR4Tma |
| Right-DOR              | C3-R4            | 102         | rightDOR102F<br>ori-2 | pBSoriC      |

**Supporting Table S4. Strains used in this study**

| Strain | Relevant genotype                                 | Sources                       |
|--------|---------------------------------------------------|-------------------------------|
| NY20   | MG1655 <i>asnA::kan</i>                           | Noguchi <i>et al.</i> , 2015  |
| NY21   | MG1655 <i>asnA::kan oriCΔR4-box::TmaDnaA-box</i>  | Noguchi <i>et al.</i> , 2015  |
| SYM24  | MG1655 <i>asnA::kan oriCΔR5M-box::TmaDnaA-box</i> | Sakiyama <i>et al.</i> , 2018 |

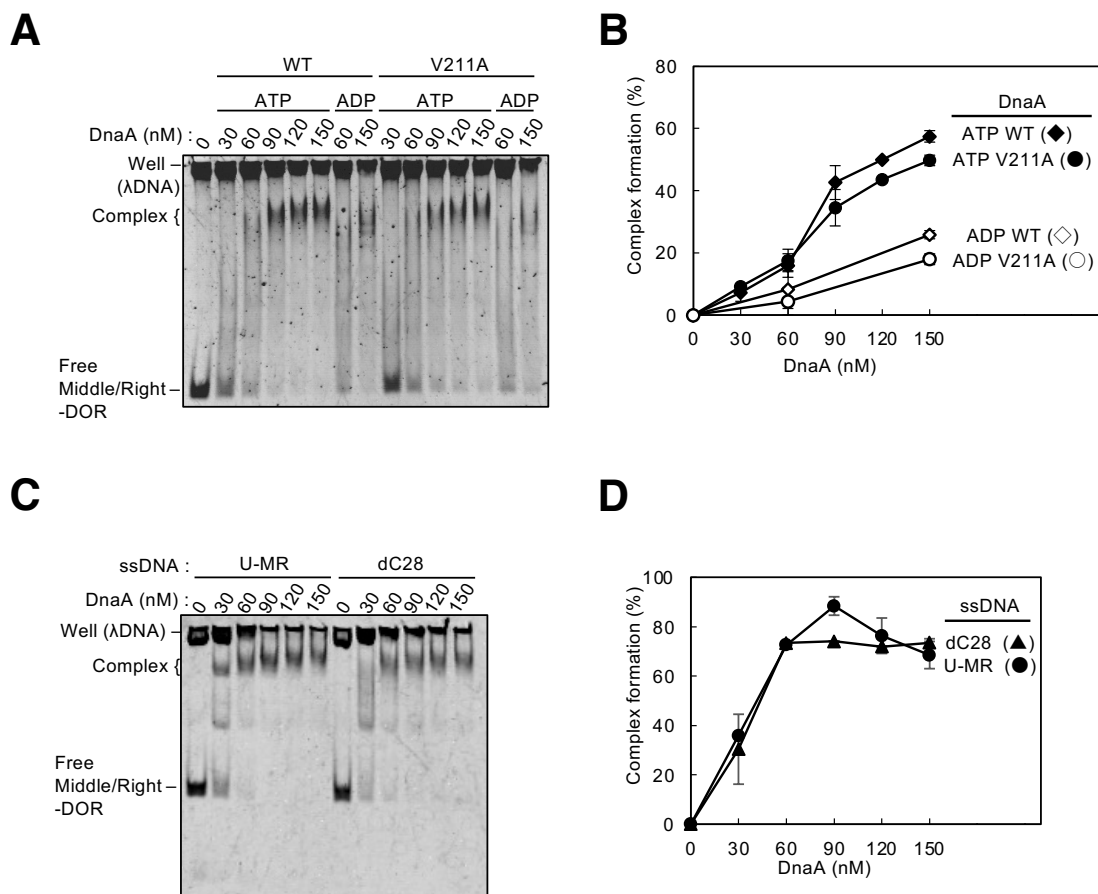

**Supporting Figure S1. DnaA complex formation with Middle/Right-DOR fragments (related to Figure 3).**

(A and B) The indicated amounts of ATP–DnaA WT or V211A mutants were incubated for 5 min at 4°C with the Middle/Right-DOR fragments (35 nM). Two independent experiments were carried out, and representative gel images (in a black/white inverted mode) are shown. Migration positions of Middle/Right-DOR–DnaA complexes and protein-free DNAs are indicated (A). Band intensities of Middle/Right-DOR–DnaA complexes were quantified as “Complex formation (%)”. Mean values with SDs (n = 2) are shown in the graphs (B).

(C and D) The indicated amounts of ATP–DnaA were incubated for 5 min at 4°C with the Middle/Right-DOR fragments (35 nM), following incubation for 10 min at 30°C with 28-mer ssDUE U-MR or oligo-dC (dC28). Two independent experiments were carried out, and representative gel images and size markers are shown as above (C). Band intensities of Middle/Right-DOR–DnaA complexes were quantified as “Complex formation (%)”. Two independent experiments were carried out and, mean values with SDs (n = 2) are shown in the graphs (D).

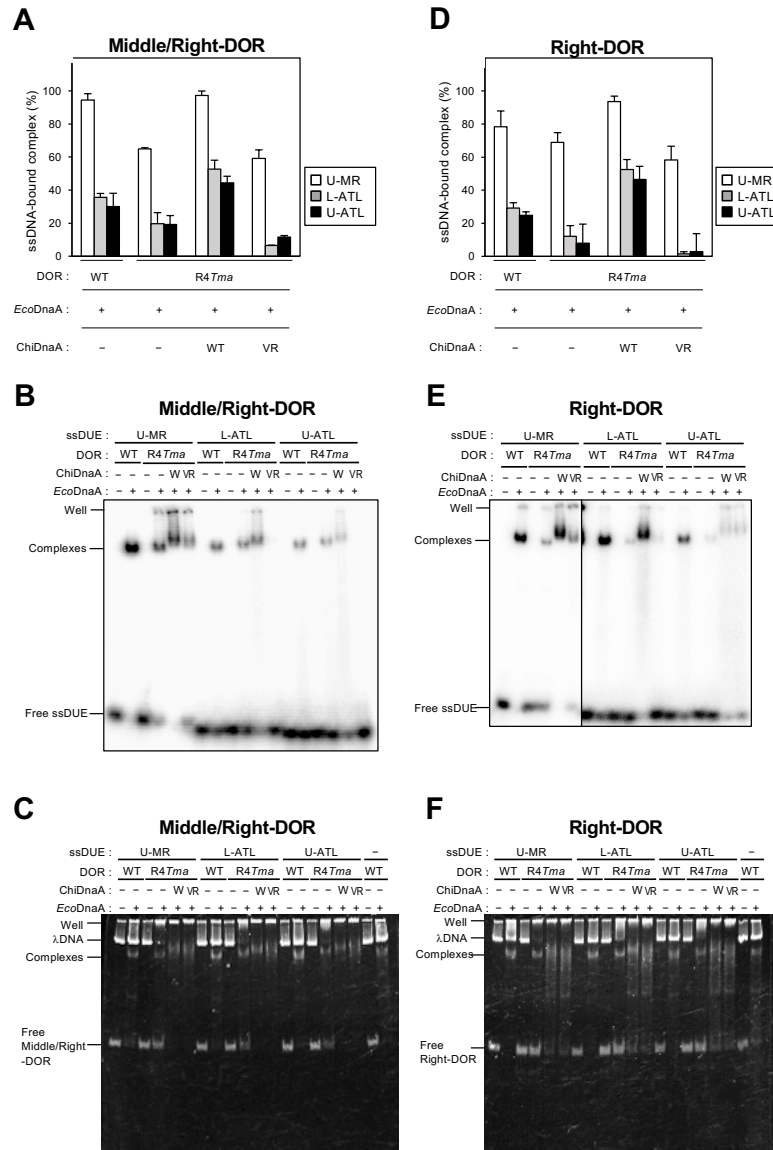

**Supporting Figure S2. EMSA using the Middle/Right-DOR or Right-DOR DNA with or without substitution of the *Tma*DnaA box for the R4 box (related to Figure 4).**

EMSA was performed with the Middle/Right-DOR (A, C, and E) or Right-DOR DNA (B, D, and F). DNAs with (R4Tma) or without (WT) R4Tma substitution were incubated for 5 min at 4°C with ATP-*Eco*DnaA (150 nM) and  $\lambda$  phage DNA in the presence of ATP-*Chi*DnaA WT or VR (35 nM), followed by further incubation for 10 min at 30°C with <sup>32</sup>P-labeled-ssDNA U-MR, U-ATL, or L-ATL (16 nM) in buffer including 80 mM potassium chloride (see *Experimental procedures*). The resultant ssDNA-DnaA-DOR (A, B, D, and E) or DnaA-DOR complexes (C and F) were analyzed by radioactive imaging or GelStar staining, respectively. The amounts of ssDNA bound to the DnaA-DOR complexes, quantified as “ssDNA-bound complex (%)”, are shown (A and B). Two independent experiments were carried out, and mean values with SDs (n = 2) are

shown in the graphs (*A* and *D*). When *EcoDnaA* and the DORs bearing the R4*Tma* substitution were co-incubated, abnormal complexes such as aggregates may have formed, including  $\lambda$  DNA, resulting in material remaining in the gel wells. However, the majority of the DORs constructed specific complexes including DnaA. +; presence. –, absence.

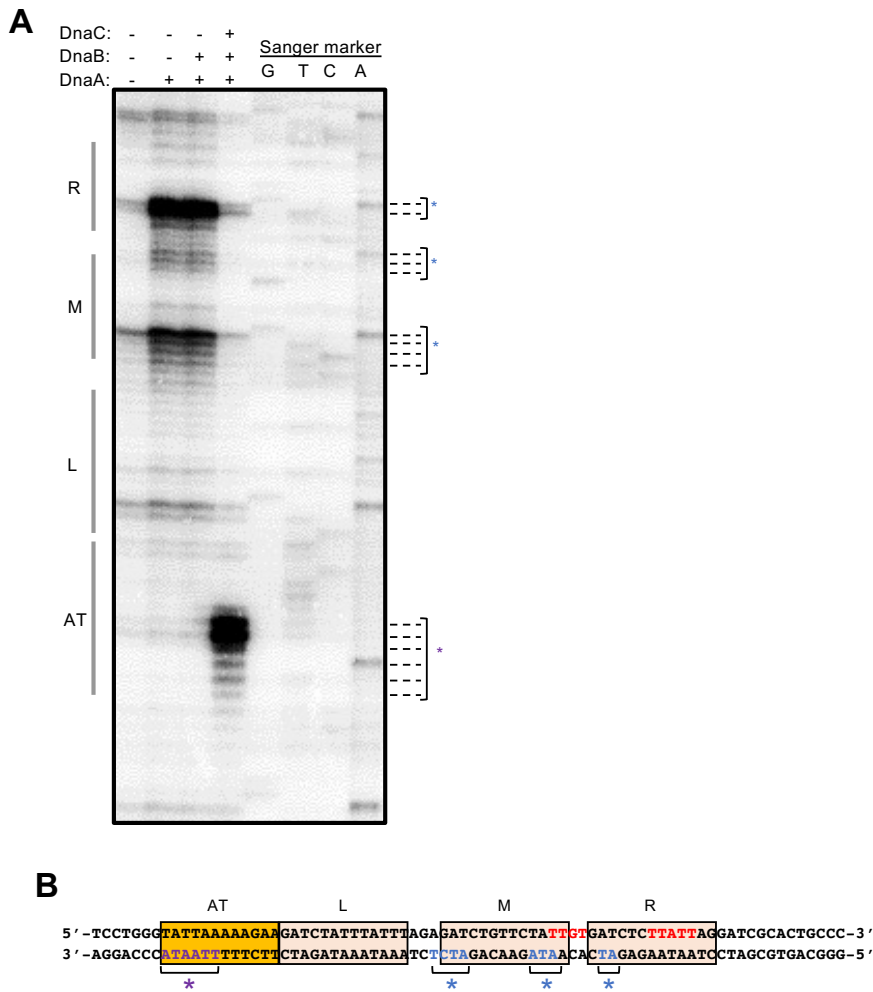

**Supporting Figure S3.** Annotation of primer extension products of  $\text{KMnO}_4$ -treated *oriC* plasmid (related to Figure 4G).

(A) Plasmid bearing *oriC* (5 nM) were incubated for 10 min at  $37^\circ\text{C}$  with IHF (100 nM) in the presence (+) or absence (-) of EcoDnaA (100 nM), DnaB K236A (300 nM), and DnaC (300 nM), followed by further incubation with 10 mM  $\text{KMnO}_4$  and primer extension experiments. The products were analyzed using 7.5% denaturing sequencing gel with a series of Sanger sequence products obtained using the same primer and *oriC* plasmid (see *Experimental procedures*). Positions of sequence motifs (L, M, R, and AT) are shown on the left. Hypersensitive bands are indicated as asterisks (blue; DnaA-dependent hypersensitive sites, purple; hypersensitive sites in the presence of DnaA, DnaB, and DnaC). (B) Corresponding sequence to the primer extension products is shown. Red letters are the known DnaA-binding motifs. Hypersensitive sites shown in *panel A* are also indicated as purple and blue letters.



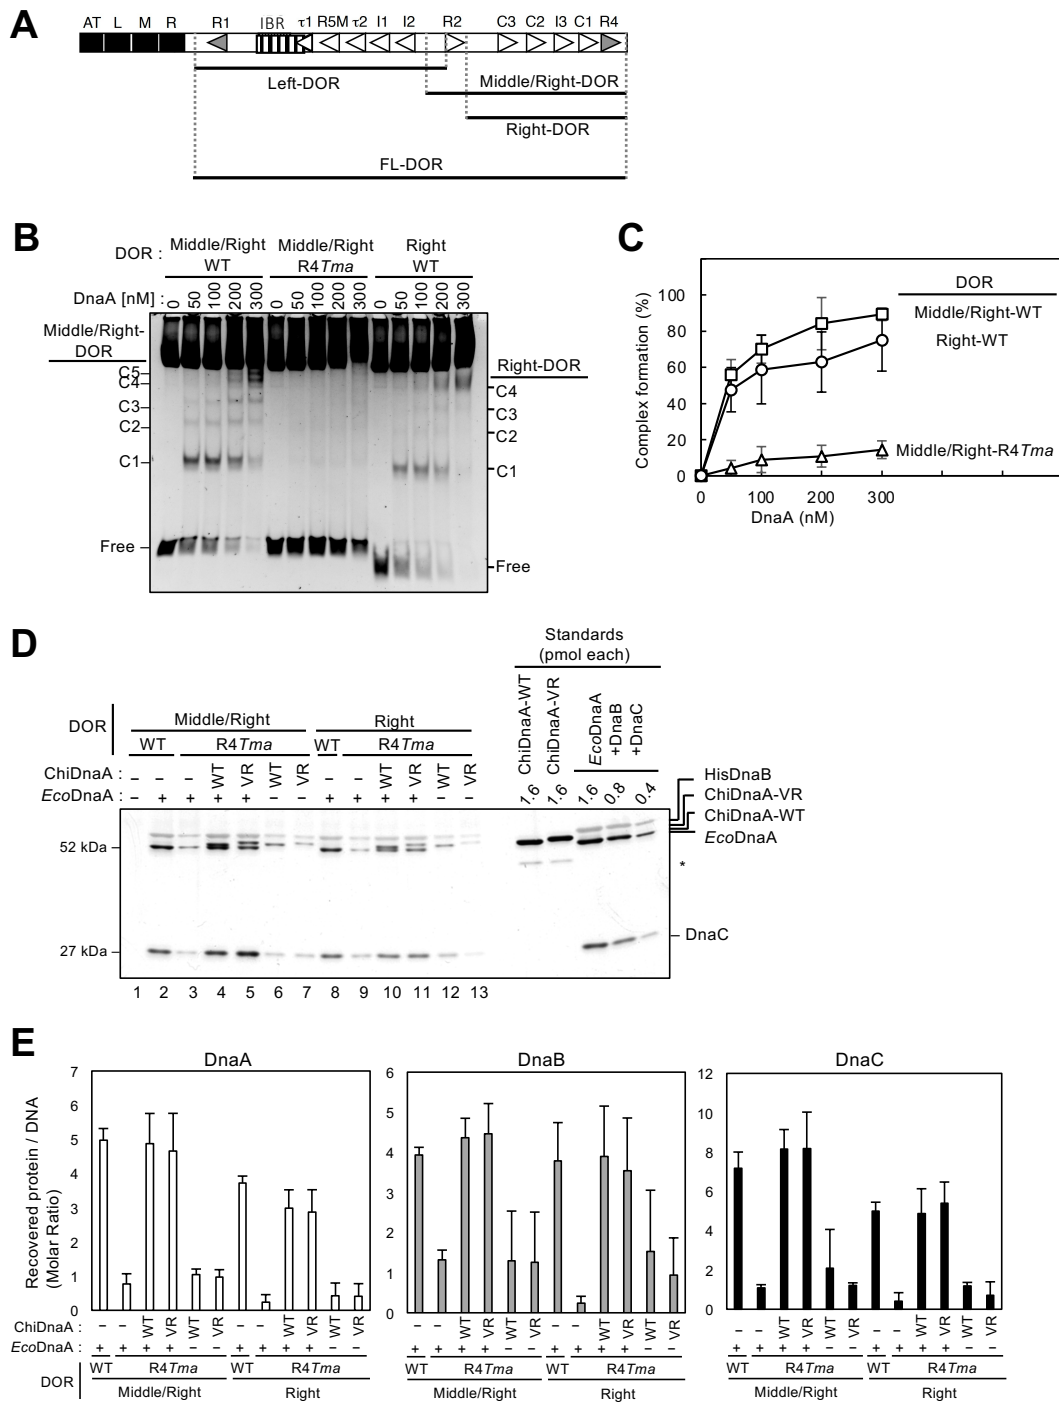

**Supporting Figure S4. Role of DnaA H/B-motifs bound at the DnaA box R4 in DnaB binding, related to Figure 5.**

(A) Schematic structures of DOR fragments are shown as bars. For symbols, see Figure 1A. (B) EMSA with the Middle/Right WT, Middle/Right R4Tma and Right-DOR fragments. Indicated concentrations of ATP–DnaA were incubated for 5 min on ice with the indicated DOR fragment (35 nM) and  $\lambda$  phage DNA, followed by further incubation for 10 min at 30°C. In the absence of

ssDUE or ChiDnaA, DnaA forms very unstable complexes on Middle/Right R4*Tma* (Noguchi *et al.*, 2015). (C) The levels of the DOR–DnaA subcomplexes, indicated as “Complex formation (%)”, were quantified from the gel images. Two independent experiments were carried out, and mean values with SDs (n = 2) are shown in the graphs. (D) ATP–DnaA (10 pmol: 0.4  $\mu$ M), His–DnaB (10 pmol as monomer), and DnaC (10 pmol) were incubated in the presence of biotinylated FL-, Middle/Right- or Right-DOR WT, or R4*Tma* (250 fmol, 10 nM), followed by pull-down assay. Proteins bound to DNA were analyzed by SDS–11% PAGE and silver staining. (E) The amounts of recovered proteins (DnaA, DnaB, and DnaC) were determined using standard curves, and the values from the negative control (No DOR) were subtracted. About 150 fmol DNA was recovered. The means and SDs (n = 2) of the numbers of DnaA, DnaB, and DnaC molecules recovered per DNA are indicated by bars.

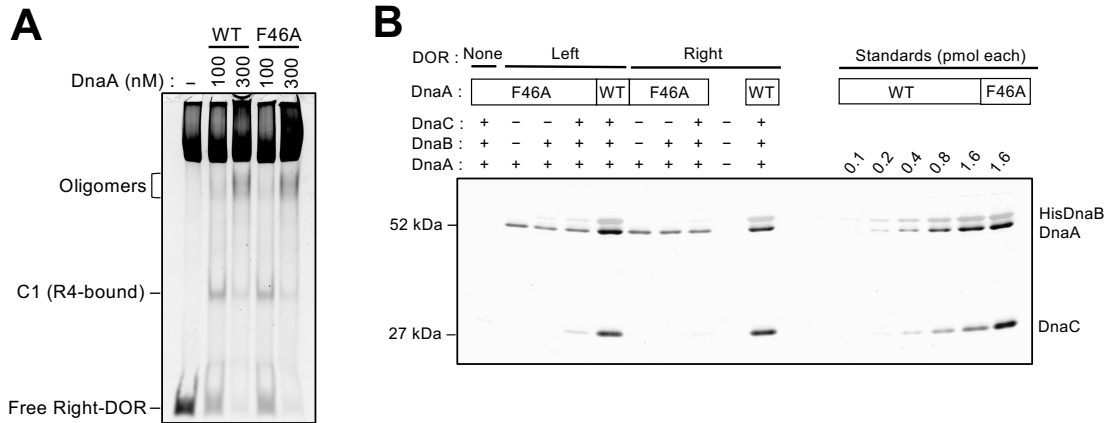

**Supporting Figure S5. DnaB binding to the Right-DOR–DnaA subcomplex requires DnaA Phe46 (related to Figure 5).** (A) EMSA with the Right-DOR fragments using DnaA WT and F46A is shown. DNA fragments (35 nM) were incubated at 30°C for 10 min in 10 µL buffer G (20 mM HEPES-KOH at pH 7.6, 1 mM EDTA, 4 mM DTT, 5 mM magnesium acetate, and 10% [v/v] glycerol) containing the indicated ATP–DnaA, 0.25 mg/mL BSA, and 200 ng λ phage DNA as a competitor. The samples were subjected to 4% PAGE in Tris-borate at room temperature, followed by GelStar staining. The experiments were performed twice, and similar results were obtained. (B) Pull-down assay using DnaA F46A mutant protein. ATP–DnaA WT or F46A (10 pmol: 0.4 µM), His-DnaB (10 pmol as monomer), and DnaC (10 pmol) were incubated in the presence of biotinylated *oriC*, Left- or Right-DOR (250 fmol, 10 nM), followed by pull-down assay. Proteins bound to DNA were analyzed by SDS–11% PAGE and silver staining.

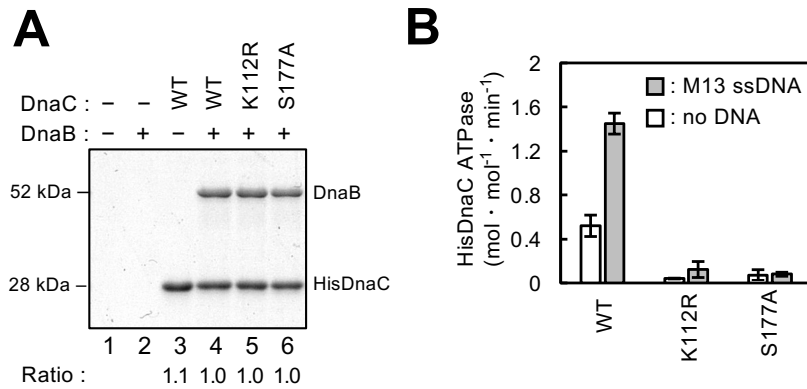

**Supporting Figure S6. DnaC mutants sustained DnaB binding and ATPase activity (related to Figure 7).** (A) DnaB WT (10 pmol as monomer) was incubated with His-DnaC WT or mutants (K112R or S177A) (10 pmol), followed by pull-down assay. The complexes of DnaB and His-DnaC were analyzed by SDS–11% PAGE and CBB staining. (B) ATPase activity of DnaC mutants. [ $\gamma$ - $^{32}$ P]ATP-bound DnaC WT or mutants (K112R or S177A) (10 pmol: 0.4  $\mu$ M) were incubated with His-DnaB (10 pmol: 0.4  $\mu$ M as monomer) in the presence or absence of M13 ssDNA (1.3 nM), followed by incubation at 37°C for 60 min. [ $\gamma$ - $^{32}$ P]ATP or [ $\gamma$ - $^{32}$ P]Pi was analyzed by thin-layer chromatography and radioactive imaging. The mean values with SDs (n = 2) are shown in the graphs.

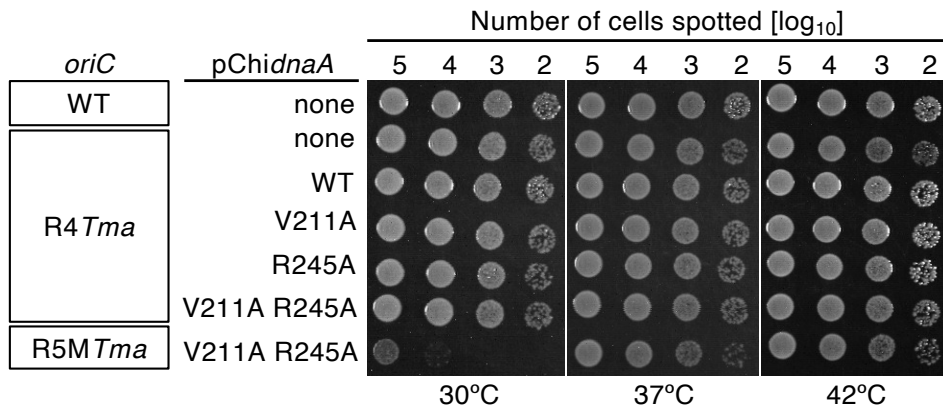

**Supporting Figure S7. Roles for DnaA H/B-motifs in cell growth (related to Figure 8).** Spot test of cells with chromosomal *oriC* R4*Tma* mutation harboring plasmids encoding ChiDnaA WT or mutants (V211A, R245A, or V211A R245A) or only vector plasmid (none). Serial dilutions of full-growth cultures ( $\sim 10^9$  cells/mL) at 30°C, 37°C, or 42°C were spotted onto LB-agar plates containing 100  $\mu\text{g}/\text{mL}$  ampicillin and incubated at the indicated temperatures.

## References

- Shimizu, M., Noguchi, Y., Sakiyama, Y., Kawakami, H., Katayama, T., and Takada, S. (2016) Near-atomic structural model for bacterial DNA replication initiation complex and its functional insights. *Proc. Natl. Acad. Sci. U. S. A.* **113**, E8021–E8030
- Noguchi, Y., Sakiyama, Y., Kawakami, H., and Katayama, T. (2015) The Arg fingers of key DnaA protomers are oriented inward within the replication origin *oriC* and stimulate DnaA subcomplexes in the initiation complex. *J. Biol. Chem.* **290**, 20295–20312
- Sakiyama, Y., Kasho, K., Noguchi, Y., Kawakami, H., and Katayama, T. (2017) Regulatory dynamics in the ternary DnaA complex for initiation of chromosomal replication in *Escherichia coli*. *Nucleic Acids Res.* **45**, 12354–12373
- Ozaki, S., and Katayama, T. (2012) Highly organized DnaA-*oriC* complexes recruit the single-stranded DNA for replication initiation. *Nucleic Acids Res.* **40**, 1648–1665
